# Supplementary material for: Down-regulation of G9a triggers DNA damage response and inhibits colorectal cancer cells proliferation
Source: PubMed Central journal article supplement (PMC4413627; doi:10.18632/oncotarget.2784), 2015-01-20
Supplement: oncotarget-06-2917-s001.pdf [file oncotarget-06-2917-s001.pdf]

## SUPPLEMENTARY FIGURES

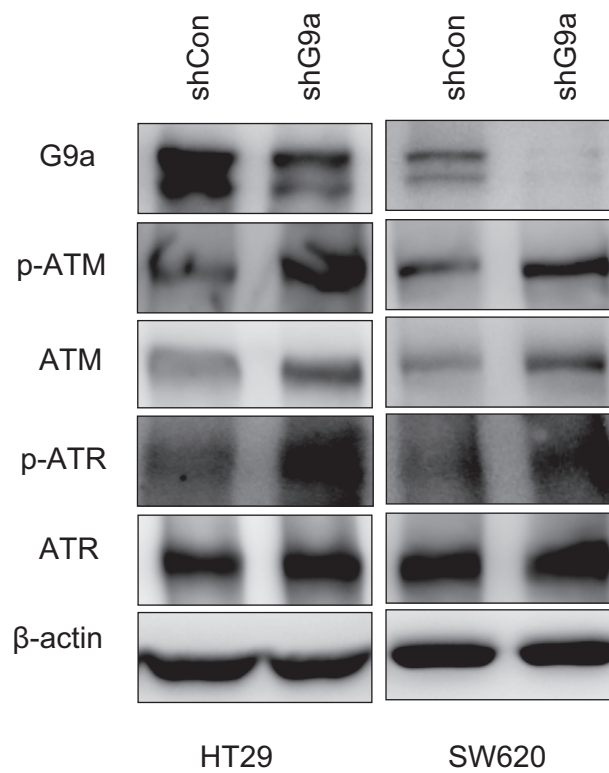

**Supplementary Figure S1: Depletion of G9a upregulates the protein level of p-ATM and p-ATR.** Protein levels of G9a, p-ATM, ATM, p-ATR, ATR and β-actin (loading control) from HT29 and SW620 cells that stably suppress G9a. Each condition was studied at  $n \geq 3$ .

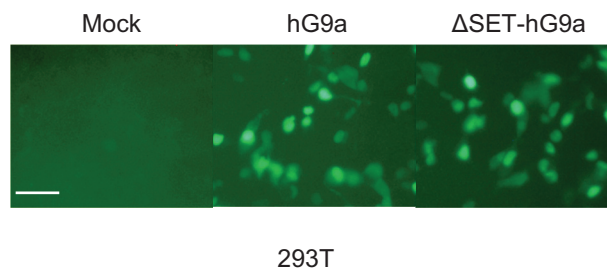

**Supplementary Figure S2: The representative pictures of 293T cell after stable transfection with GFP-tagged full length or SET domain deleted G9a (scale bar 25 μM).**

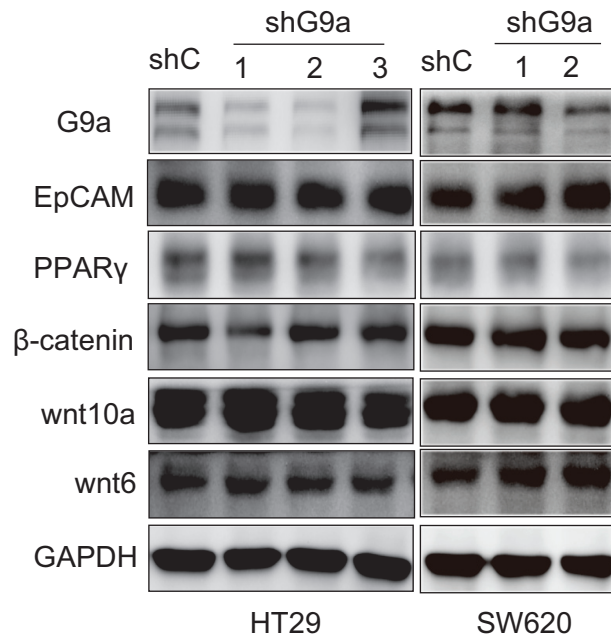

**Supplementary Figure S3: Depletion of G9a has no effect on EpCAM, PPAR $\gamma$ , and Wnt expression.** Protein levels of G9a, EpCAM, PPAR $\gamma$ ,  $\beta$ -catenin, Wnt6, Wnt10a and GAPDH (loading control) from HT29 and SW620 cells that stably suppress G9a. Each condition was studied at  $n \geq 3$ .
